# Supplementary material for: Engineering of thioesterase YciA from Haemophilus influenzae for production of carboxylic acids
Source: Springer Nature journal article supplement (doi:10.1007/s00253-023-12691-1), 2023-08-12
Supplement: MOESM1 [file 253_2023_12691_MOESM1_ESM.pdf]

## Online Resource - Supplementary Information

### Engineering of thioesterase YciA from *Haemophilus influenzae* for production of carboxylic acids

Laura Pöschel<sup>1,2</sup>, Mónica Guevara-Martínez<sup>3</sup>, David Hörnström<sup>3</sup>, Antonius J.A. van Maris<sup>3</sup>, Markus Buchhaupt<sup>1\*</sup>

<sup>1</sup> DECHEMA-Forschungsinstitut, Microbial Biotechnology, Theodor-Heuss-Allee 25, 60486 Frankfurt am Main, Germany

<sup>2</sup> Faculty of Biological Sciences, Goethe University Frankfurt, Max-von-Laue-Str. 9, 60438 Frankfurt am Main, Germany

<sup>3</sup> Department of Industrial Biotechnology, School of Engineering Sciences in Chemistry, Biotechnology and Health, KTH Royal Institute of Technology, AlbaNova University Center, SE 10691 Stockholm, Sweden

\*Corresponding author,

Phone: +49-69-7564-629, e-mail address: markus.buchhaupt@dechema.de

**Fig. S1** Growth kinetics and time-dependent concentration of 2-methylsuccinic acid, 2-hydroxy-3-methylsuccinic acid and mesaconic acid in supernatant of *M. extorquens* AM1 harboring YciAHI variants

**Fig. S2** Growth kinetics and time-dependent concentration of 2-methylsuccinic acid and mesaconic acid in supernatant of *M. extorquens* AM1 harboring plasmids encoding YciAHI FLAG, YciAHI F35L FLAG or an empty pCM160 vector

**Fig. S3** Uncorrected (2S)-methylsuccinyl-CoA conversion tests with purified YciAHI and YciAHI F35L thioesterases

**Fig. S4** Growth kinetics and time-dependent concentration of 2-methylsuccinic acid, 2-hydroxy-3-methylsuccinic acid and mesaconic acid in supernatant of *M. extorquens* AM1 harboring YciAHI F35 variants

**Fig. S5** Alignment of TE6 family members ( $\alpha$ -helix domain)

**Fig. S6** Alignment of TE4 family members ( $\alpha$ -helix domain)

**Fig. S7** Alignment of TE7 family members (presumed  $\alpha$ -helix domain)

**Fig. S8** Alignment of TE8 family members ( $\alpha$ -helix domain)

**Fig. S9** Alignment of TE11 family members ( $\alpha$ -helix domain)

**Fig. S10** Alignment of TE31 family members ( $\alpha$ -helix domain)

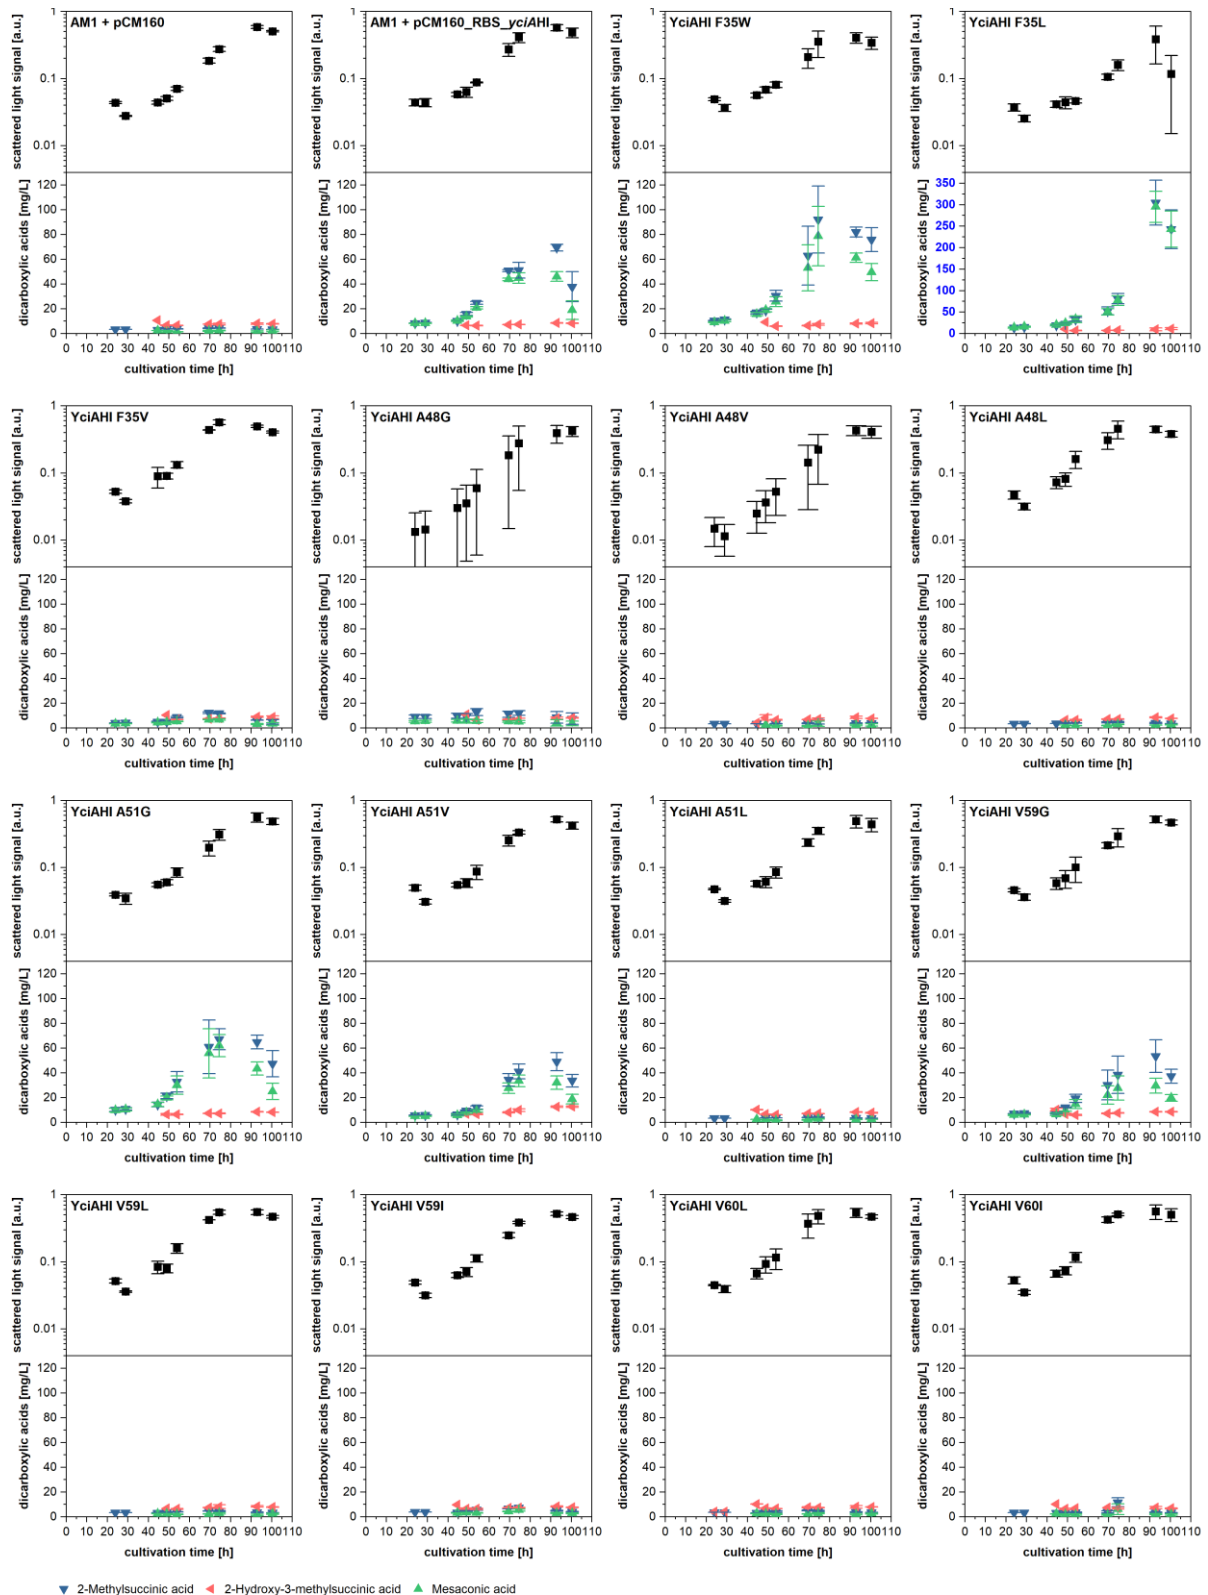

**Fig. S1** Growth kinetics and time-dependent concentration of 2-methylsuccinic acid, 2-hydroxy-3-methylsuccinic acid and mesaconic acid in supernatant of *M. extorquens* AM1 harboring YciAHI variants (untagged). EMCP-derived carboxylic acid products with titers insufficient for quantification (< 5 mg/L) are not displayed. Error bars represent standard deviations from three independent replicates

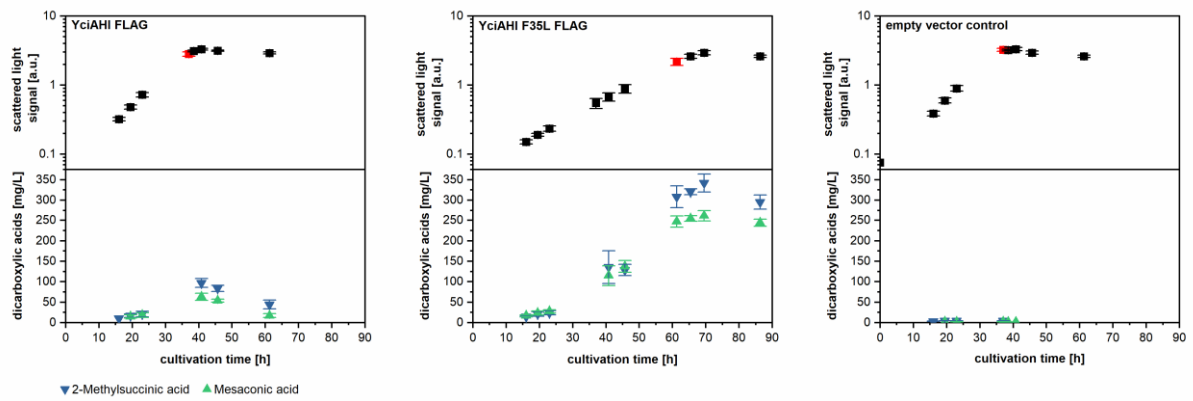

**Fig. S2** Growth kinetics and time-dependent concentration of 2-methylsuccinic acid and mesaconic acid in supernatant of *M. extorquens* AM1 harboring plasmids encoding C-terminal FLAG-tagged YciAHI, C-terminal FLAG-tagged YciAHI F35L or an empty pCM160 vector. Red squares indicate the sampling time points for SDS-PAGE samples. Error bars represent standard deviations from three independent replicates

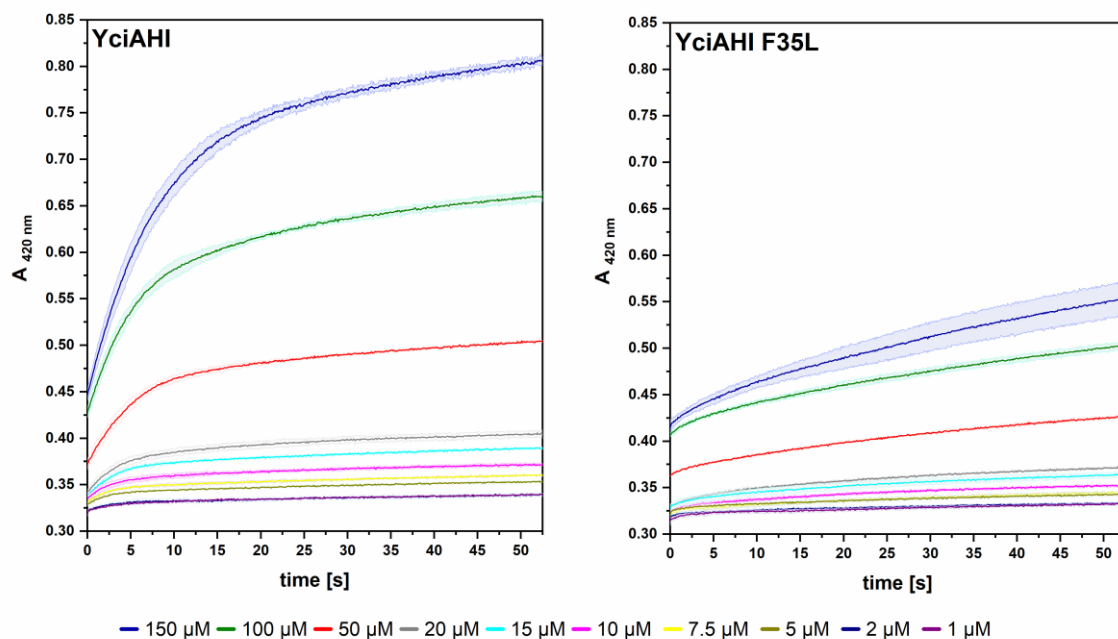

**Fig. S3** Uncorrected (2S)-methylsuccinyl-CoA conversion tests with purified N-terminal His-tagged YciAHI and N-terminal His-tagged YciAHI F35L thioesterases. Values were determined with a DTNB assay at pH 7.5 and 25°C using 1-150  $\mu\text{M}$  of (2S)-methylsuccinyl-CoA as substrate (color coded concentrations) and 7.5  $\mu\text{M}$  of purified enzyme. Prior to addition of the protein, the assay mixture containing all other components was equilibrated to 25 °C. The formation of DTNB-derived 5-thio-2-nitrobenzoate was measured at 412 nm. All measurements were done in triplicates

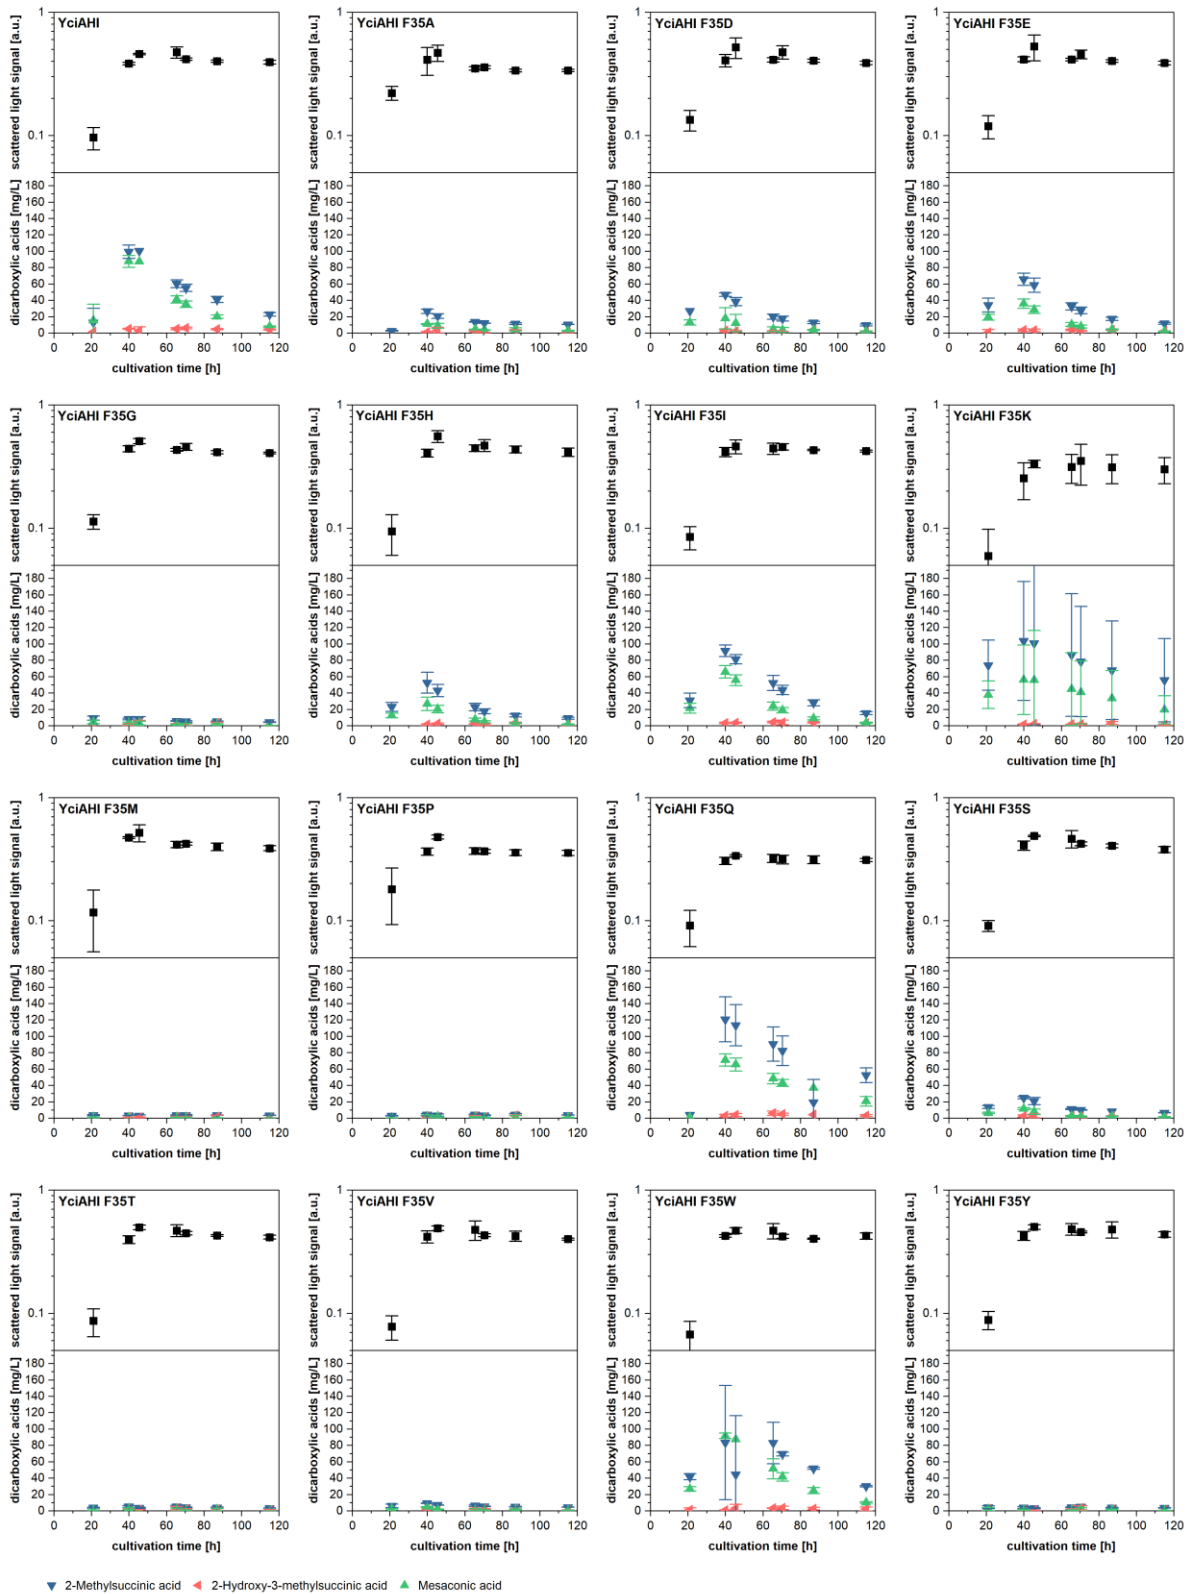

**Fig. S4** Growth kinetics and time-dependent concentration of 2-methylsuccinic acid, 2-hydroxy-3-methylsuccinic acid and mesaconic acid in supernatant of *M. extorquens* AM1 harboring YciAHI F35 variants (untagged). EMCP-derived carboxylic acid products with titers insufficient for quantification (< 5 mg/L) are not displayed. Error bars represent standard deviations from three independent replicates





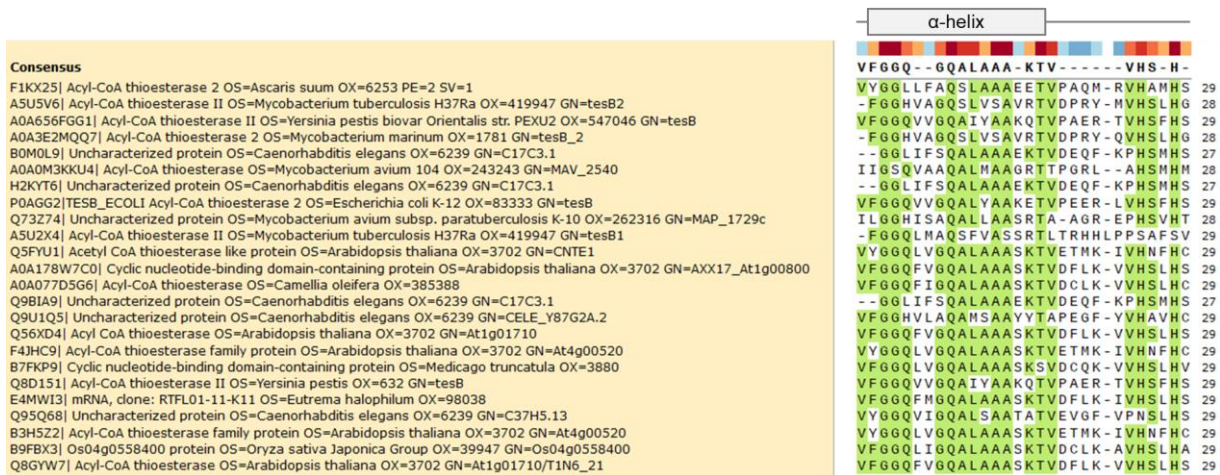

**Fig. S6** Alignment of TE4 family members ( $\alpha$ -helix domain). Sequences were acquired from ThYme (<https://thyme.engr.unr.edu/v2.0/>). Alignment was done in COBALT (Papadopoulos and Agarwala 2007) and visualized with SnapGene (GSL Biotech LLC, San Diego, Canada). Consensus with a threshold of 80% is shown. Amino acids corresponding to consensus are highlighted in green



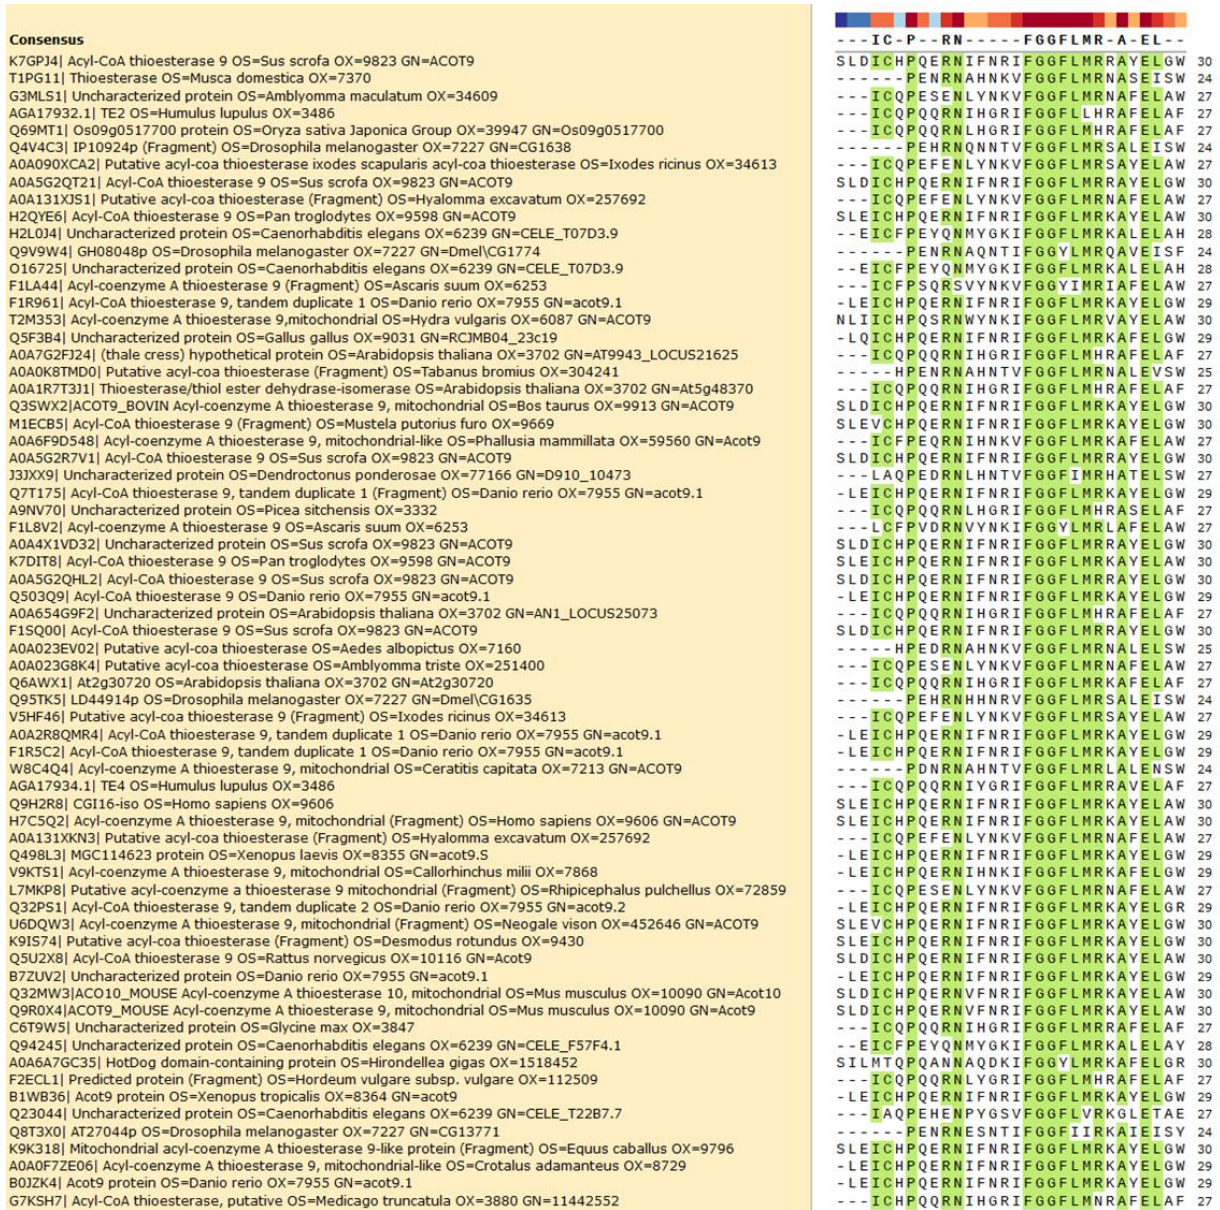

**Fig. S7** Alignment of TE7 family members (presumed  $\alpha$ -helix domain). Sequences were acquired from ThYme (<https://thyme.engr.unr.edu/v2.0/>). Alignment was done in COBALT (Papadopoulos and Agarwala 2007) and visualized with SnapGene (GSL Biotech LLC, San Diego, Canada). Consensus with a threshold of 80% is shown. Amino acids corresponding to consensus are highlighted in green







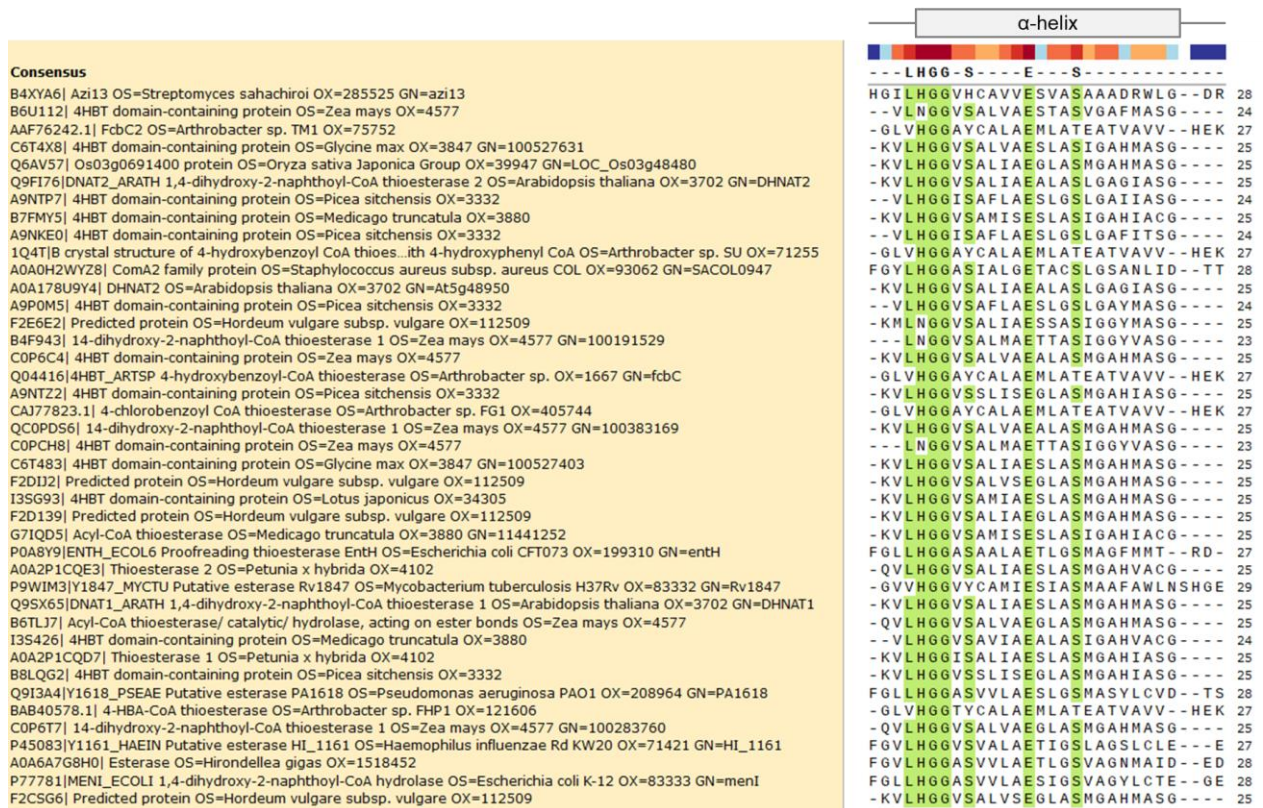

**Fig. S9** Alignment of TE11 family members ( $\alpha$ -helix domain). Sequences were acquired from ThYme (<https://thyme.engr.unr.edu/v2.0/>). Alignment was done in COBALT (Papadopoulos and Agarwala 2007) and visualized with SnapGene (GSL Biotech LLC, San Diego, Canada). Consensus with a threshold of 80% is shown. Amino acids corresponding to consensus are highlighted in green

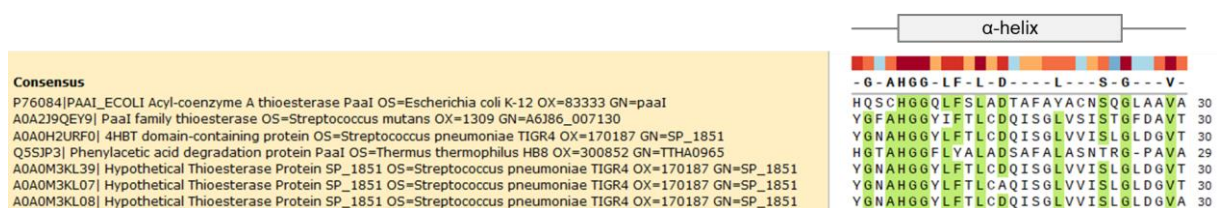

**Fig. S10** Alignment of TE31 family members ( $\alpha$ -helix domain). Sequences were acquired from ThYme (<https://thyme.engr.unr.edu/v2.0/>). Alignment was done in COBALT (Papadopoulos and Agarwala 2007) and visualized with SnapGene (GSL Biotech LLC, San Diego, Canada). Consensus with a threshold of 80% is shown. Amino acids corresponding to consensus are highlighted in green

## Reference list

Papadopoulos JS, Agarwala R (2007) COBALT: constraint-based alignment tool for multiple protein sequences. *Bioinformatics* 23:1073–1079.  
<https://doi.org/10.1093/bioinformatics/btm076>
